# Supplementary material for: Label-free amplified fluorescence detection of DNA biomarkers based on KFP polymerase-driven double strand displacement reactions and magnetic nanoprobes
Source: Royal Society of Chemistry journal article supplement (doi:10.1039/d0ay00338g), 2020-01-01
Supplement: d0ay00338g1.pdf [file d0ay00338g1.pdf]

**Table S1: Sequences of oligonucleotides used in this study**

| Name      | The sequence of p53 DNA should be                                                             |
|-----------|-----------------------------------------------------------------------------------------------|
| p53 DNA   | TCA TCA CAC TGG AAG ACT C                                                                     |
| HPa       | CTC AGC ACG GCT CTT TCA ACA TCA GTC TGA TAA GCT TCC<br>AAG GAG CCG TGC TGA GTA T              |
| HPb       | TTT CGG CTG GTT TAT TTT TAT TTT ATA TAC TCA GCT TTC CAG<br>CCG G                              |
| HPc       | GGA GCC GTT TAT TTC TTA GTT TCT CCG GCT GTT TCG GCT CC                                        |
| Biotin-CP | Biotin-TTT TTT TTT AAG CTT ATC AGA CTG ATG AAA ATG AGT<br>ATA TAA AAT TAT ACG GAG AAA CTA AGA |
| RP        | TCA ACA TCA GTC TGA TAA GCT ACC CTC AGC GAG TCT TCC<br>AGT GTG ATG A                          |
| T1        | TCA TCA CAC TGG AAG AAT C                                                                     |
| T2        | TCA TCA CAC TGG AAG GAT C                                                                     |
| Tn        | GGT CTC TTG ATA GCA CTC G                                                                     |

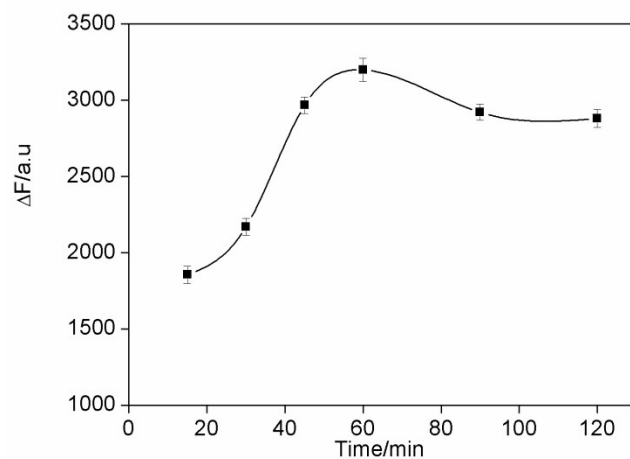

**Fig S1** Fluorescence intensity versus first SDA reaction time in the sensing system. RP, 1  $\mu$ M; P53 DNA, 0.5  $\mu$ M; dNTPs, 10 mM; Nb.BvCI, 2.5 U; KFP, 1U; HPa, HPb, HPc, 1  $\mu$ M; SG I, 10 $\times$ .

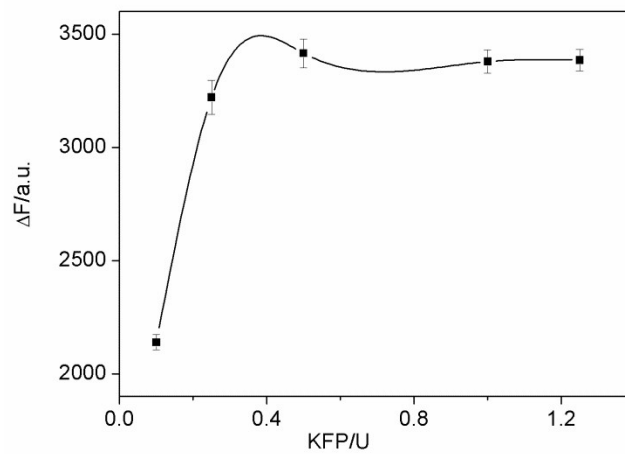

**Fig S2** Fluorescence intensity versus the dosage of polymerase (KFP) in the sensing system. RP, 1  $\mu$ M; P53 DNA, 0.5  $\mu$ M; dNTPs, 10 mM; Nb.BvCI, 2.5 U; HPa, HPb, HPc, 1  $\mu$ M; SG I, 10 $\times$ ; first SDA reaction time 60 min.

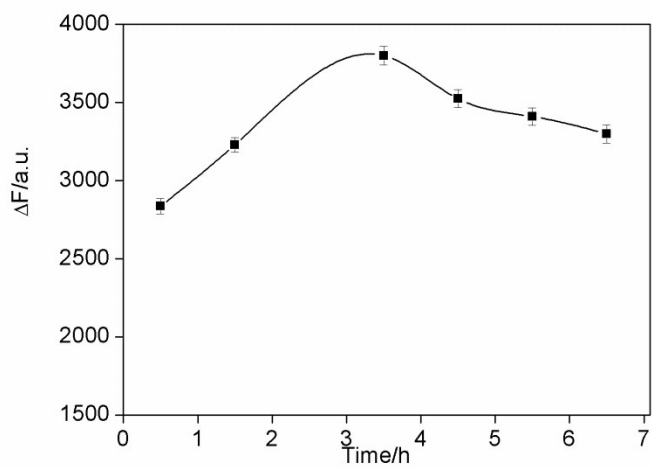

**Fig.S3** Fluorescence intensity versus the reaction time of downstream SDA in the sensing system. RP, 1  $\mu\text{M}$ ; P53 DNA, 0.5  $\mu\text{M}$ ; dNTPs, 10 mM; Nb.BvCI, 2.5 U; KFP 0.5 U; HPa, HPb, HPc, 0.6  $\mu\text{M}$ ; SG I, 10 $\times$ ; first SDA reaction time 60 min.

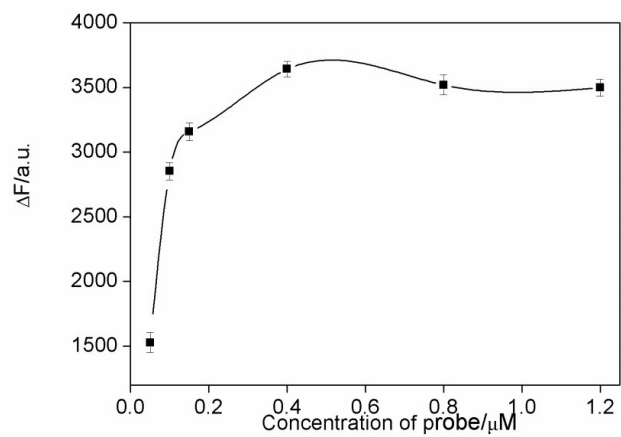

**Fig.S4** Fluorescence intensity versus the concentration of HPn probe in the sensing system. RP, 1  $\mu\text{M}$ ; P53 DNA, 0.5  $\mu\text{M}$ ; dNTPs, 10 mM; Nb.BvCI, 2.5 U; KFP 0.5 U; SG I, 10 $\times$ ; first SDA reaction time 60 min.

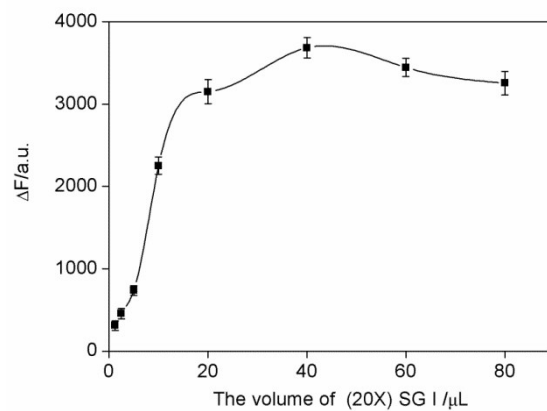

**Fig.S5** Fluorescence intensity versus the dosage of SG I (20X) in the sensing system. RP, 1  $\mu$ M; P53 DNA, 0.5  $\mu$ M; dNTPs, 10 mM; Nb.BvCI, 2.5 U; KFP 0.5 U; HPa, HPb, HPc, 0.6  $\mu$ M; first SDA reaction time, 60 min, the downstream SDA, 3.5 h.

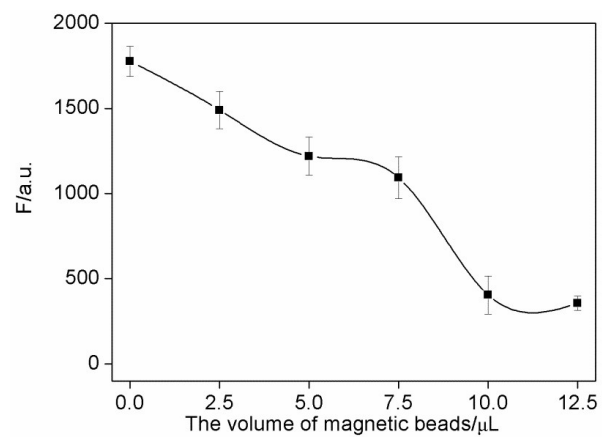

**Fig.S6** Fluorescence intensity versus dosage of magnetic sphere in the sensing system. RP, 1  $\mu\text{M}$ ; dNTPs, 10 mM; Nb.BvCl, 2.5 U; KFP 0.5 U; HPa, HPb, HPc, 0.6  $\mu\text{M}$ ; SG I, 20 $\times$ .

**Table S2. Comparison of different methods for p53 gene detection**

| <b>Method</b>               | <b>Nucleic acid amplification strategy</b> | <b>Detection limit</b> | <b>Detection Range</b> | <b>Ref.</b> |
|-----------------------------|--------------------------------------------|------------------------|------------------------|-------------|
| Electrochemical             | Rolling circle amplification               | 0.36 pM                | 0.5-10 pM              | [1]         |
| Fluorescence                | Multiple strand displacement amplification | 10 pM                  | 10 pM-70 nM            | [2]         |
| Fluorescence                | Reverse strand displacement amplification  | 1 nM                   | 1-100 nM               | [3]         |
| Electrochemiluminescence    | <i>NA</i>                                  | 0.03 nM                | 0.1-15 nM              | [4]         |
| Quartz crystal microbalance | <i>NA</i>                                  | 0.3 nM                 | not given              | [5]         |
| Quartz crystal microbalance | <i>NA</i>                                  | 0.1 nM                 | 0.5-25 nM              | [6]         |
| Electrochemistry            | <i>NA</i>                                  | 230 pM                 | 1.0-95 nM              | [7]         |
| Colorimetric                | Rolling circle amplification               | 25 fM                  | 2.5fM-2.5nM            | [8]         |
| Electrochemical             | NA                                         | 3nM                    | 2.9-3.4nM              | [9]         |
| Fluorescence                | Rolling circle                             | 0.07 fM                | 0.1 -500 fM            | [10]        |



|                          |  |                              |          |              |                  |
|--------------------------|--|------------------------------|----------|--------------|------------------|
|                          |  | amplification                |          |              |                  |
|                          |  | Hyperbranched                |          |              |                  |
| Electrochemiluminescence |  | Rolling Circle Amplification | 0.02 fM  | 0.05 -100 fM | [11]             |
|                          |  | Double strand displacement   |          |              |                  |
| Fluorescence             |  | amplification                | 0.012 nM | 0.01-1 nM    | <b>This work</b> |

**Table S3. Detection of p53 gene in spiked urine samples by the proposed sensing system**

| <b>sample</b> | <b>Added p53 gene/nM</b> | <b>Measured p53 gene/nM</b> | <b>Recovery/%</b> | <b>RSD/%</b> |
|---------------|--------------------------|-----------------------------|-------------------|--------------|
| <b>1</b>      | 1.0                      | 1.08                        | 108.0             | 7.12         |
| <b>2</b>      | 0.2                      | 0.195                       | 97.50             | 6.87         |
| <b>3</b>      | 0.02                     | 0.021                       | 105.0             | 6.47         |

## References

1. Y. j. Jia, F. F. Sun, N. Na and J. Ouyang, *Anal. Chim. Acta*, 2019, **1060**, 64.
2. C. Xue, S. Xiao a, C. H. Ouyang, C. C. Li, Z. H. Gao, Z. F. Shen and Z. S. Wu, *Anal. Chim. Acta*, 2019, **1051**, 179.
3. L. S. Wang, Y. Han, S. Xiao, S. Lv, C. Wang, N. Zhang, Z. Y. Wang, Y. Q. Tang, H. B. Li, J. X. Lyu, H. Xu and Z. F. Shen, *Talanta*, 2018, **187**, 365.
4. Y. Liu, X. Q. Chen and Q. Ma, *Biosens. Bioelectron.*, 2018, **117**, 240.
5. D. Z. Wang, W. Tang, X. J. Wu, X. Y. Wang, G. J. Chen, Q. Chen, N. Li and F. Liu, *Anal. Chem.*, 2012, **84**, 7008.
6. W. Tang, D. Z. Wang, Y. Xu, N. Li and F. Liu, *Chem. Commun.*, 2012, **48**, 6678.
7. Z. Dai, T. Cai, W. Y. Zhu, X. Y. Gao and X. Y. Zou, *Chem. Commun.*, 2013, **49**, 1939.
8. H. B. Li, Z. S. Wu, L. P. Qiu, J. W. Liu, C. Wang, G. L. Shen and R. Q. Yu, *Biosens. Bioelectron.*, 2013, **50**, 180.
9. B. Esteban-Fernandez de Avila, E. Araque, S. Campuzano, M. Pedrero, B. Dalkiran, R. Barderas, R. Villalonga, E. Kilic and J. M. Pingarron, *Anal. Chem.*, 2015, **87**, 2290.
10. X. Li, J. Song, Q. W. Xue, H. Y. Zhao, M. Liu, B. L. Chen, Y. Liu, W. Jiang and C. Z. Li, *Analyst*, 2017, **142**, 3598.
11. L. L. Yang, Y. Z. Tao, G. Y. Yue, R. B. Li, B. Qiu, L. H. Guo, Z. Y. Lin and H. H. Yang, *Anal. Chem.*, 2016, **88**, 5097.
